# Supplementary material for: Fabrication of cobalt gallium oxide with zinc iron oxide on nickel foam for a high-performance asymmetric supercapacitor
Source: Royal Society of Chemistry journal article supplement (doi:10.1039/c8nj05854g), 2019-01-01
Supplement: c8nj05854g1.pdf [file c8nj05854g1.pdf]

## Supporting information

# Fabrication of cobalt gallium oxide with zinc iron oxide on nickel foam for high performance asymmetric supercapacitor

Akbar Mohammadi Zardkhoshoui<sup>a</sup>, Saied Saeed Hosseiny Davarani<sup>a\*</sup>, Masumeh Hashemi<sup>b</sup>

<sup>a</sup> Faculty of Chemistry, Shahid Beheshti University, G. C., 1983963113, Evin, Tehran, Iran.

<sup>b</sup> Chemistry & Materials Research Center, Niroo research institute, Tehran, Iran.

\*Corresponding author, Tel: +98 21 22431661; Fax: +98 21 22431661.

E-mail addresses: ss-hosseiny@sbu.ac.ir (S.S.H. Davarani)

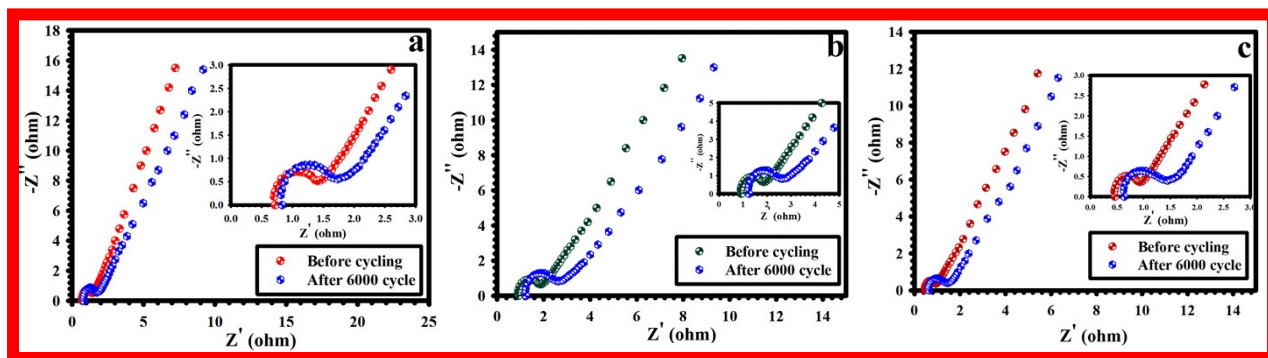

**Fig. S1.** (a) Nyquist plot of the  $\text{CoGa}_2\text{O}_4$  (CGO)/nickel foam electrode in 2 M KOH solution before and after 6000 cycling. (b) Nyquist plot of the  $\text{ZnFe}_2\text{O}_4$  (ZFO)/nickel foam electrode in 2 M KOH solution before and after 6000 cycling. (c) Nyquist plot of the our device before and after 6000 cycling

**Table S1.** Comparison of the electrochemical performance of  $\text{CoGa}_2\text{O}_4$  (CGO)// $\text{ZnFe}_2\text{O}_4$  (ZFO) in three and two electrode systems with other previously reported electrodes.

| Composition                                                                                                          | Capacitance<br>3 and 2<br>electrodes (F<br>g <sup>-1</sup> )                                                                          | Cycles,<br>retention 2<br>and 3<br>electrode                                                                                           | ED (W h<br>kg <sup>-1</sup> ) 2<br>Electrode | Synthesis method  | Reference    |
|----------------------------------------------------------------------------------------------------------------------|---------------------------------------------------------------------------------------------------------------------------------------|----------------------------------------------------------------------------------------------------------------------------------------|----------------------------------------------|-------------------|--------------|
| NiCo <sub>2</sub> O <sub>4</sub> /GO                                                                                 | 709.7 (3 E)<br>96.2 (2 E)                                                                                                             | 3000, 84.7 %<br>(3 E)<br>5000, 94.3 (2<br>E)                                                                                           | 34.4                                         | Hydrothermal      | 1            |
| rHGO/NiCo <sub>2</sub> O <sub>4</sub> @CF                                                                            | 1178 (3 E)<br>192.5 (2 E)                                                                                                             | 5000, 87.4 %<br>(3 E)<br>5000, 82.7%<br>(2 E)                                                                                          | 74.88                                        | Hydrothermal      | 2            |
| NiCo <sub>2</sub> O <sub>4</sub>                                                                                     | 1229 (3 E)<br>68.7 (2 E)                                                                                                              | 3000, 86.3%<br>(3 E)<br>2000, 87.8%<br>(2 E)                                                                                           | 21.5                                         | Hydrothermal      | 3            |
| CuCo <sub>2</sub> O <sub>4</sub>                                                                                     | 1330 (3 E)                                                                                                                            | 5000, 93.6%<br>(3 E)                                                                                                                   | 29.55                                        | Electrodeposition | 4            |
| Nickel-cobalt sulfide                                                                                                | 1036 440 (3<br>E)<br>119.1 (2 E)                                                                                                      | 2000, 87% (3<br>E)<br>10000, 87.6%<br>(2 E)                                                                                            | 42.3                                         | Hydrothermal      | 5            |
| PCs/NiCo <sub>2</sub> S <sub>4</sub>                                                                                 | 605.2 (3 E)<br>190 (2 E)                                                                                                              | 5000, 91.3%<br>(3 E)<br>5000, 92.7%<br>(2 E)                                                                                           | 23.3                                         | Hydrothermal      | 6            |
| CoGa <sub>2</sub> O <sub>4</sub> (Positive<br>electrode)<br>ZnFe <sub>2</sub> O <sub>4</sub> (Negative<br>electrode) | 1379.16 (3 E<br>CoGa <sub>2</sub> O <sub>4</sub> )<br>300.5 (3 E<br>ZnFe <sub>2</sub> O <sub>4</sub> )<br>232.2 (2 E)<br>352.30 (2 E) | 6000, 96.6 (3<br>E CoGa <sub>2</sub> O <sub>4</sub> )<br>6000,<br>91.1(3E<br>ZnFe <sub>2</sub> O <sub>4</sub> )<br>6000, 96.4 (2<br>E) | 82.56                                        | Electrodeposition | This<br>work |

## References:

- 1 J. W. Mao, C. H. He, J. Q. Qi A. B. Zhang, Y. W. Sui, Y. Z. He, Q. K. Meng and F. X. Wei, *J. Electron. Mater.* 2018, **47**, 512-520.
- 2 S. Lia, K. Yang, P. Ye, H. Jiang, Z. Zhang, Q. Huang, L. Wang, *Appl. Surf. Sci.* 2019, **473**, 326-333.
- 3 K. Xu, J. Yang, J. Hu, *J. Colloid Interface Sci.* 2018, **511**, 456-462.
- 4 L. Abbasi, M. Arvand, *Appl. Surf. Sci.* 2018, **445**, 272-280.
- 5 L. F. Shen, L. Yu, H. B. Wu, X. Y. Yu, X. G. Zhang, X. W. Lou, *Nat. Commun.* 2015, **6**, 7694.
6. M. Yu, Y. Han, Y. Li, J. Li, L. Wang, *Appl. Surf. Sci.* 2019, **463**, 1001-1010.
